# Supplementary material for: Peak learning of mass spectrometry imaging data using artificial neural networks
Source: PubMed Central journal article supplement (PMC8452737; doi:10.1038/s41467-021-25744-8), 2021-09-20
Supplement: 41467_2021_25744_MOESM3_ESM.pdf [file 41467_2021_25744_MOESM3_ESM.pdf]

## **Description of Additional Supplementary Files**

File Name: Supplementary Data 1

Description: Reduced list of  $m/z$  values revealed as main determinants of the molecular patterns captured in the latent space in the analysis of 5 different datasets.

File Name: Supplementary Data 2

Description: Peak list from the different cross-validation models.

File Name: Supplementary Data 3

Description: List of peaks identified by both msiPL and the OMP of the 3D MALDI MSI PDX GBM dataset.
